# Supplementary material for: Dendritic cell Piezo1 directs the differentiation of TH1 and Treg cells in cancer
Source: eLife. 2022 Aug 22;11:e79957. doi: 10.7554/eLife.79957 (PMC9451538; doi:10.7554/eLife.79957)
Supplement: Figure 1—source data 1. [file elife-79957-fig1-data1.xlsx]

## Sheet: Sheet1
	mm2
	Day 0			Day 5			Day 10			Day 15			Day 20			Day 25			Day 30			Day 35			Day 40
	WT	KO		WT	KO		WT	KO		WT	KO		WT	KO		WT	KO		WT	KO		WT	KO		WT	KO
1	0	0		5	6		8	8		16	14.5		36	52		47	84		89	156		135	214		170	346
2	0	0		5	8		8	6		17	14		51	53		33	66		72	131		120	186		192	294
3	0	0		7	7		10	10		16	16		22	55		61	98		102	172		140	240		138	320
4	0	0		7	5		9	8		20	15		23	65		35	89		92	165		140	223		150	317
5	0	0		8	8		9	8		19	15		21	47		39	70		93	140		136	225		178	309
6	0	0		8	8		8	9		18	14		40	44		47	70		102	155		136	215		182	333
7	0	0		5	7		8	10		19	15		44	47		53	96		78	163		130	210		182	327
8	0	0		6	6		8	8		19	16		40	50		60	124		90	172		143	227		184	335
9	0	0		8	8		9	7		17	15		41	53		49	86		78	139		140	190		175	300
10	0	0		8	5		9	7		18	15		37	54		50	88		89	145		139	192		170	307
